# Supplementary material
Source: HighWire-hosted journal article supplement (https://jnm.snmjournals.org/highwire/filestream/104729/field_highwire_adjunct_files/0/262502_Supplemental_Data.pdf)

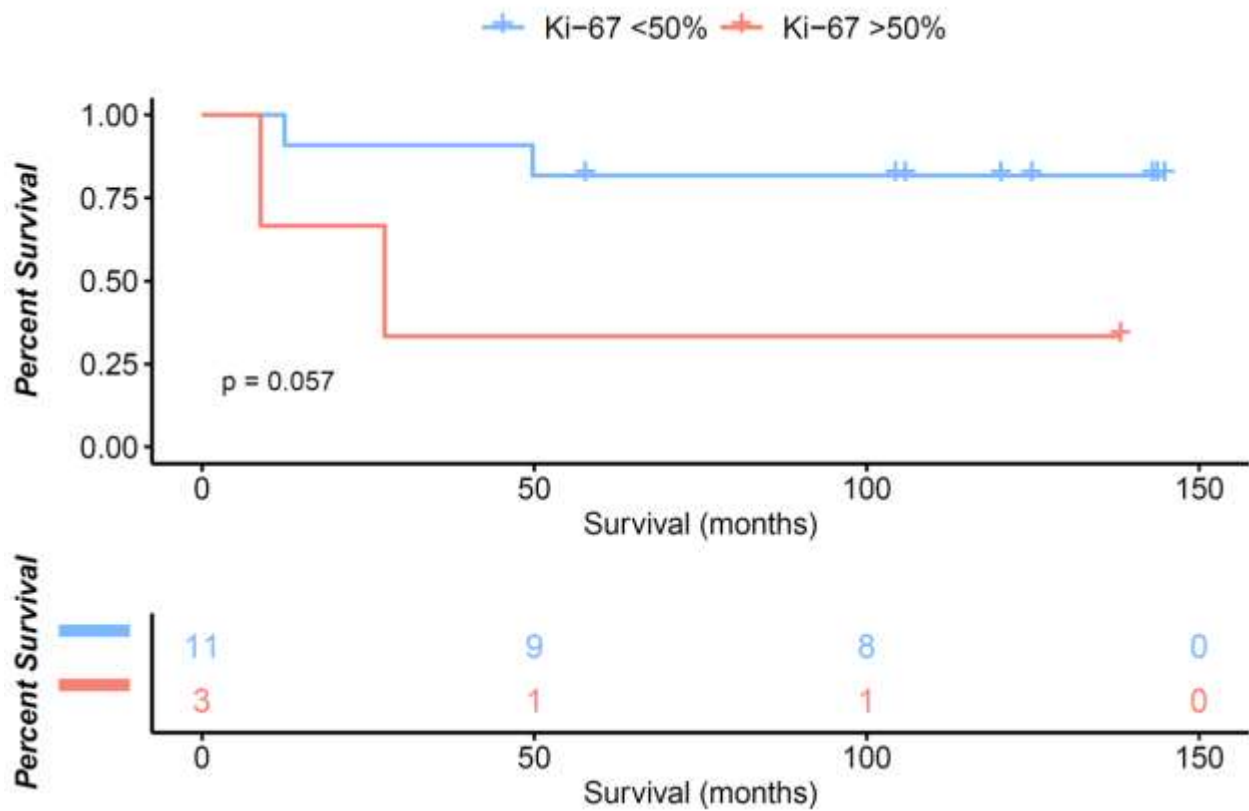

**Supplemental Figure 1:** Kaplan Meier curves for DSS survival dichotomized by Ki-67  $\geq$  50% vs < 50% post-NAT.

Supplement: 262502_Supplemental_Data.pdf [file 262502_Supplemental_Data.pdf]
